# Supplementary material for: High-fat diet-induced diabetes leads to vascular alterations, pericyte reduction, and perivascular depletion of microglia in a 6-OHDA toxin model of Parkinson disease
Source: PubMed Central journal article supplement (PMC8353816; doi:10.1186/s12974-021-02218-8), 2021-08-10
Supplement: 12974_2021_2218_MOESM3_ESM.pdf [file 12974_2021_2218_MOESM3_ESM.pdf]

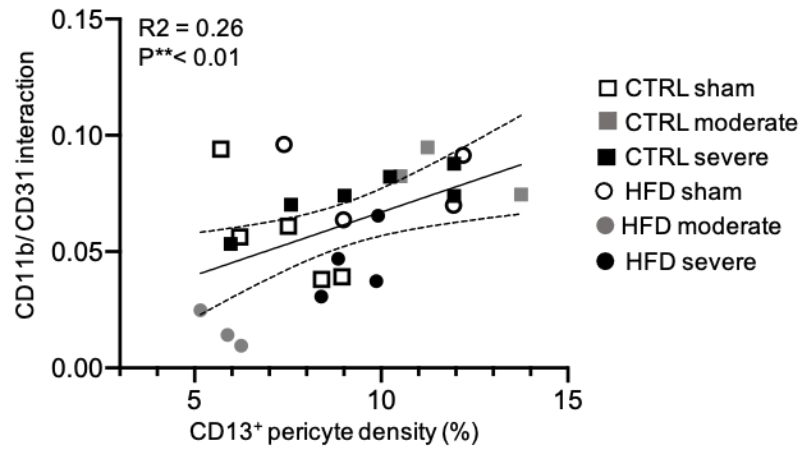

Additional figure 3: Linear regression analysis between the CD11b<sup>+</sup>/CD31<sup>+</sup> interaction density and the CD13<sup>+</sup> pericyte density of sham, moderate and severe lesion group fed with either CTRL diet or HFD. Sham mice (CTRL diet: n=5, HFD: n=4), moderate lesion (CTRL diet: n=3, HFD: n=3) and severe lesion (CTRL diet: n=6, HFD: n=4). p<sup>\*\*</sup> < 0.01.
